# Supplementary material for: Fatty Acid-Binding Proteins Aggravate Cerebral Ischemia-Reperfusion Injury in Mice
Source: MDPI journal article supplement (doi:10.3390/biomedicines9050529), 2021-05-10
Supplement: s1 [file s1]

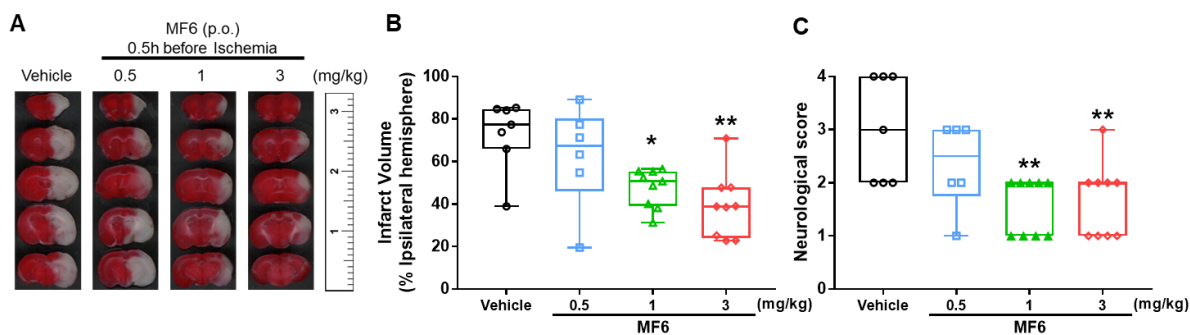

**Figure. S1.** Effects of MF6 pre-treatment on ischemia/reperfusion injury in mice. Mice were subjected to tMCAO for 2 h. MF6 was administrated with different concentrations (0.5, 1, 3 mg/kg) 30 min before reperfusion. Representative images of TTC staining (A), quantitative analysis of infarct volume (B) and neurological deficits (C) 24 h after reperfusion (n=6-9). Each data column represents the mean  $\pm$  S.E.M. \* $p < 0.05$ , \*\* $p < 0.01$  vs. I/R-treated with CMC group (Vehicle).

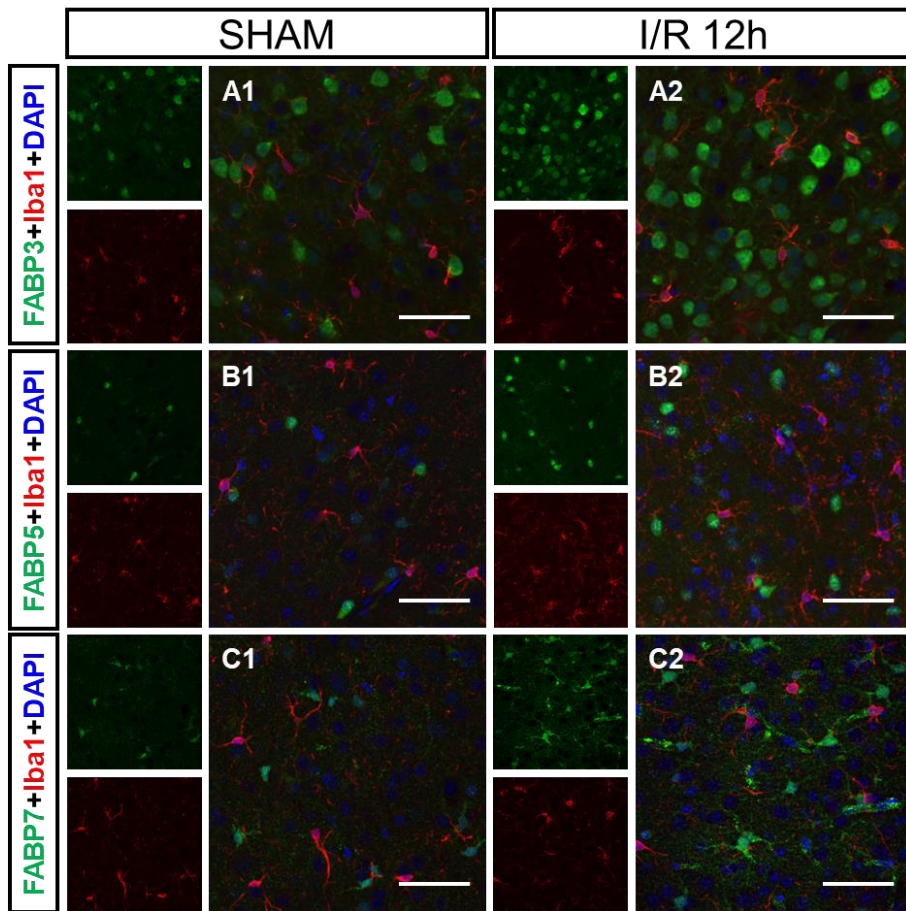

**Figure. S2.** Immunofluorescence of FABP3, FABP5 and FABP7 proteins, as well as Iba1 (a marker of microglia), in the cortices of sham and ischemia/reperfusion mice. Representative micrographs of immunostaining FABP3 (green, A), FABP5 (green, B), and FABP7 (green, C) with Iba1 (red) in the cortical penumbra regions of sham mice and I/R mice (ipsilateral) at 12 h after reperfusion. Scale bar = 50  $\mu$ m.

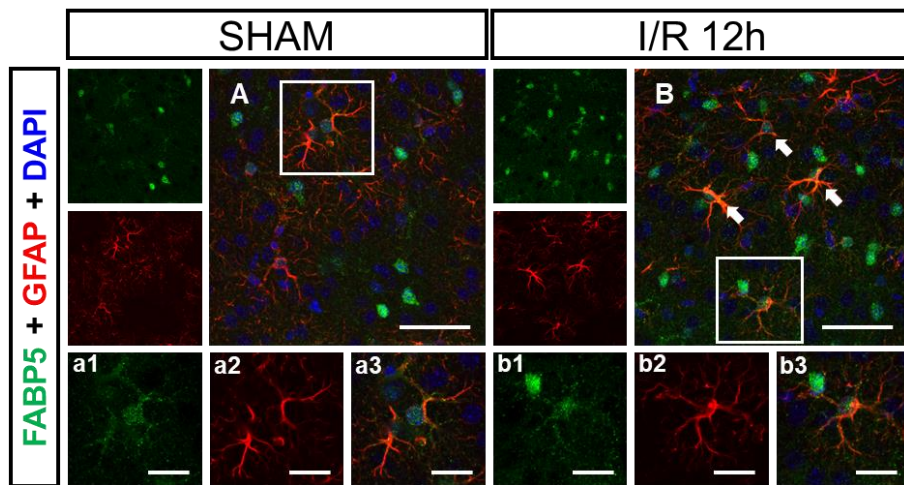

**Figure. S3.** Immunofluorescence of FABP5 with GFAP in the cortex of sham and ischemia/reperfusion mice. Representative micrographs of immunostaining with FABP5 (green) and GFAP (an astrocyte marker, red) in the cortical penumbra region at 12 h after reperfusion in sham mice (A) and I/R mice (ipsilateral) (B). Scale bar = 50  $\mu$ m. Magnified images of the regions in the white boxes are shown in sub-panels a and b. Scale bar = 20  $\mu$ m.
